# Supplementary material for: Leucine-rich repeat-containing 8B protein is associated with the endoplasmic reticulum Ca2+ leak in HEK293 cells
Source: Oxford University Press journal article supplement (doi:10.1242/jcs.203646), 2017-11-15
Supplement: jcs203646supp.pdf [file jcs203646supp.pdf]

## Supplementary figures

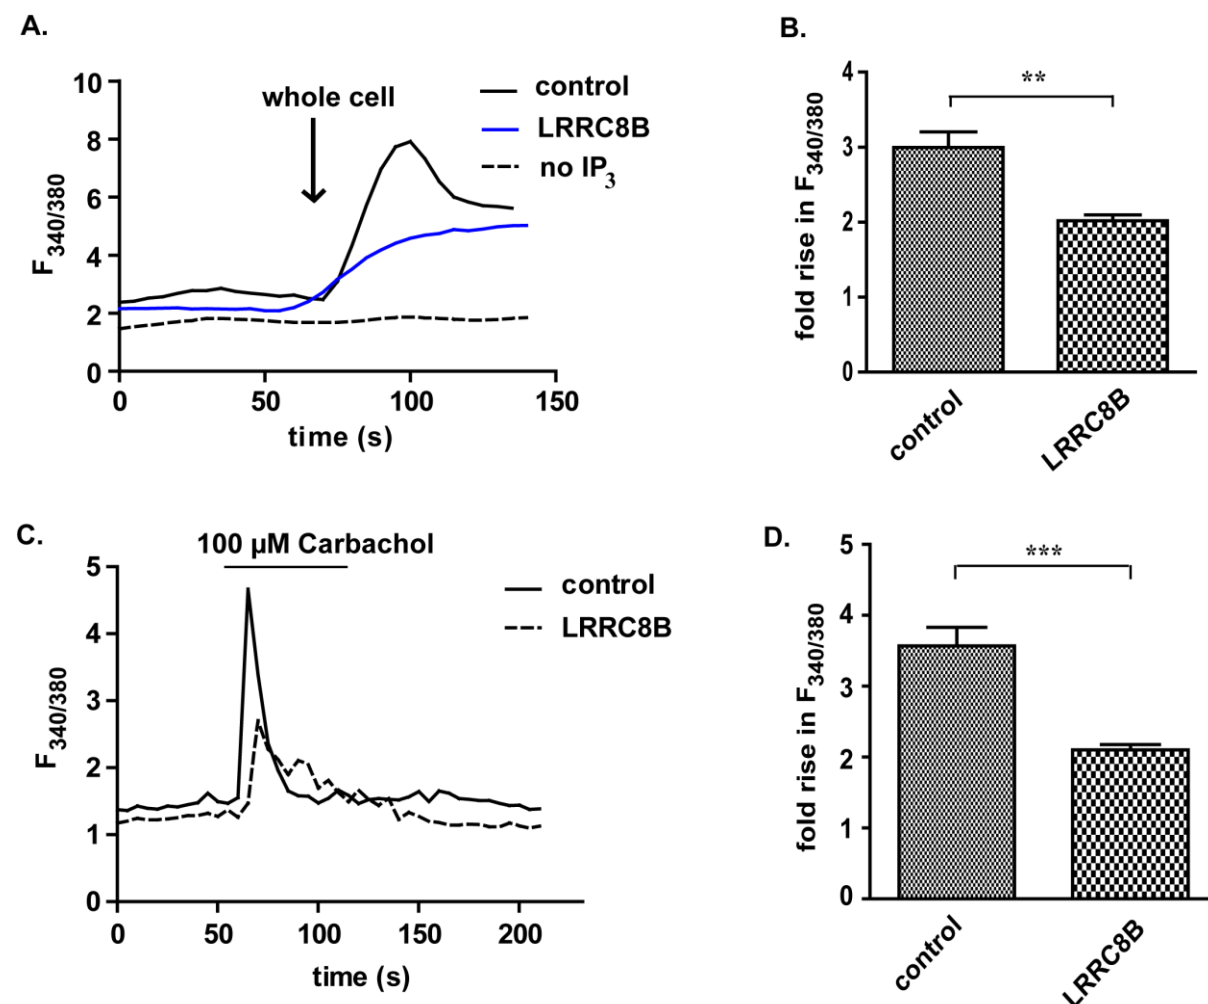

### S1. Overexpression of LRRC8B suppresses $IP_3$ R-activated intracellular $Ca^{2+}$ ( $[Ca^{2+}]_c$ ) rise

**A:**  $[Ca^{2+}]_c$  transients evoked by injecting  $IP_3$  (50 $\mu$ M) in HEK293 cells.  $IP_3$  was administered through a patch pipette by making 'whole cell'. Both pipette solution and ECF had no  $Ca^{2+}$ .

**B:** Cumulative data (mean  $\pm$  SEM, n = 7-10) showing significantly lesser  $IP_3$ -induced  $[Ca^{2+}]_c$  rise in LRRC8B overexpressed cells . **C:** Representative traces showing  $[Ca^{2+}]_c$  rise, elicited

by the application of 100  $\mu$ M carbachol, in nominally  $Ca^{2+}$ -free external buffer. **D:**

Cumulative data (mean  $\pm$  SEM, n = 36-42) showing significantly lesser rise of  $[Ca^{2+}]_c$  by carbachol in LRRC8B overexpressed cells .

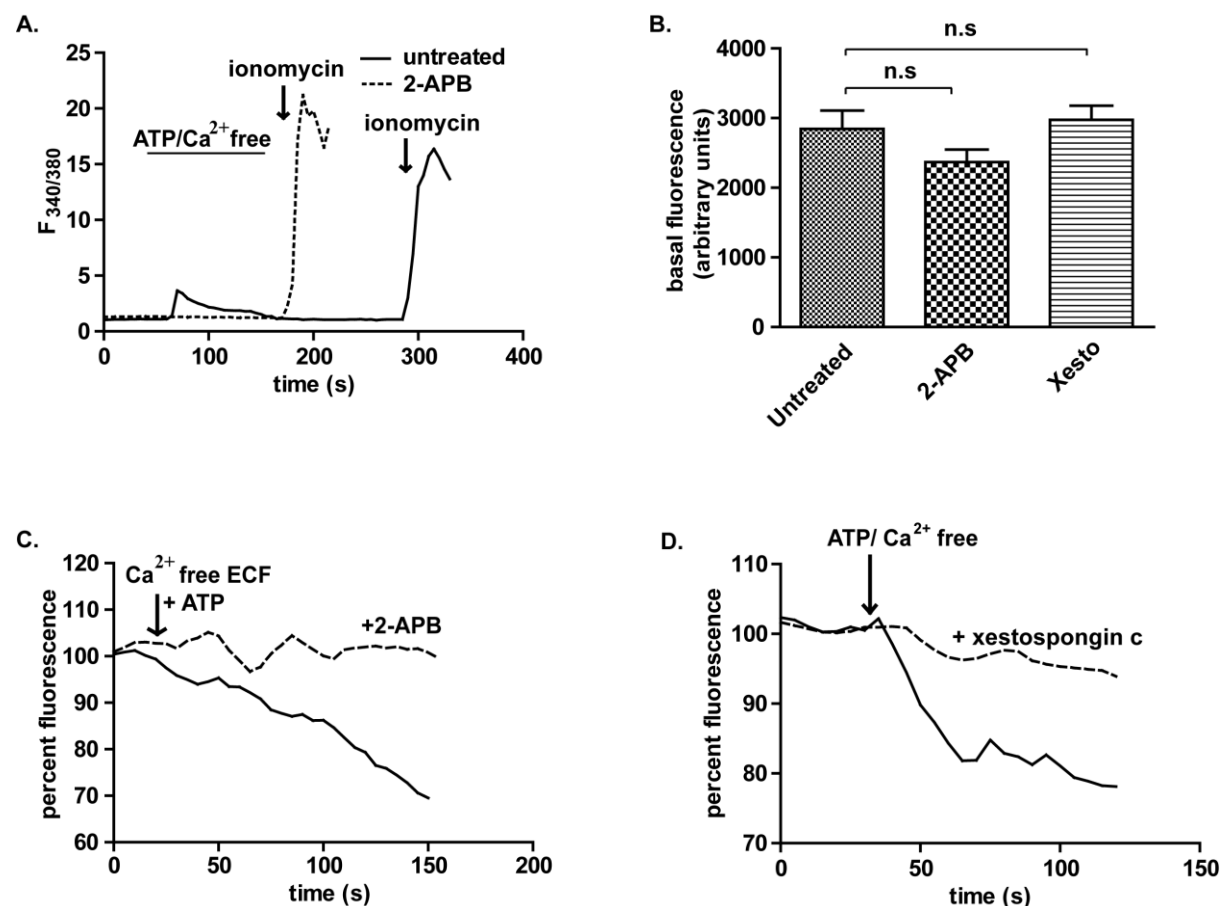

## S 2. 2-APB and xestospongine c do not alter ER- $Ca^{2+}$ stores

A: ER- $Ca^{2+}$  stores were accessed with high concentration (5 $\mu$ M) of ionomycin in  $Ca^{2+}$ -free ECF. Robust rise of  $[Ca^{2+}]_c$  following ionomycin treatment reflects the amount of  $Ca^{2+}$  present in stores. Both control and 2-APB treated cells exhibited ionomycin-mediated  $[Ca^{2+}]_c$  rise to the similar extent. Cells were first incubated with or without 2-APB for 10 mins, after which ATP was applied in  $Ca^{2+}$ -free ECF. Then ionomycin (in  $Ca^{2+}$ -free ECF) was applied to release ER- $Ca^{2+}$ . ATP (100 $\mu$ M) caused a rise in  $[Ca^{2+}]_c$  in control cells but not in 2-APB

treated cells. *B*: ER- $\text{Ca}^{2+}$  imaging with ER-targeted  $\text{Ca}^{2+}$  indicator RCEPIA1er reveals no significant difference in basal  $[\text{Ca}^{2+}]_{\text{ER}}$  between untreated HEK293 cells and cells subjected to 2-APB (50 $\mu\text{M}$ ) and xestospongin c (5 $\mu\text{M}$ ) treatment. *C*: and *D*:  $\text{Ca}^{2+}$  imaging in ER reveals no notable decay of luminal  $\text{Ca}^{2+}$  following ATP treatment ( in  $\text{Ca}^{2+}$ -free ECF) in 2-APB (50 $\mu\text{M}$ ) and xestospongin c (3  $\mu\text{M}$ )-treated cells. Untreated control cells (no blocker) showed quick release of ( $[\text{Ca}^{2+}]_{\text{ER}}$  by ATP.

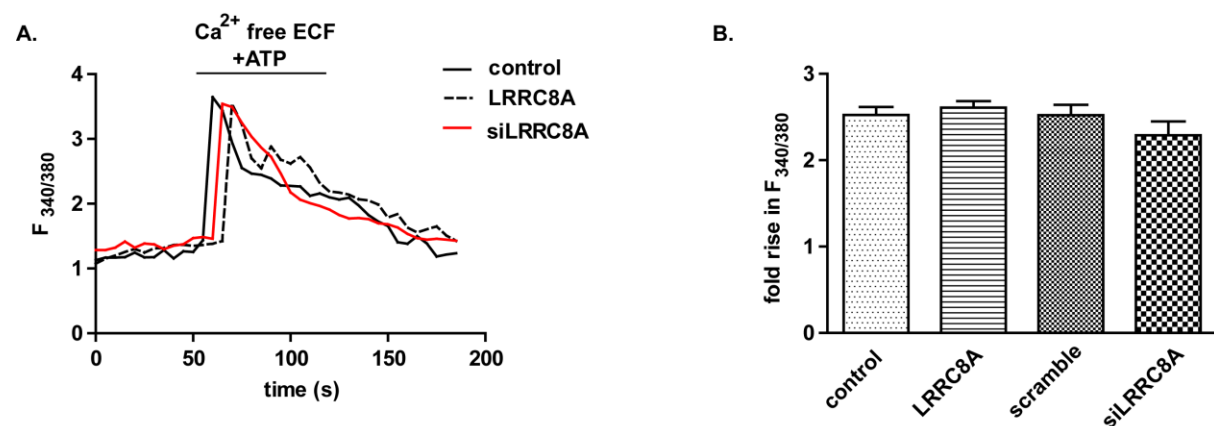

### S 3. LRRC8A does not affect ATP-induced release of $\text{Ca}^{2+}$ from stores.

*A*: Characteristic  $[\text{Ca}^{2+}]_{\text{c}}$  traces in response to 100  $\mu\text{M}$  ATP in nominally  $\text{Ca}^{2+}$ -free external buffer in HEK-293 Cells. Overexpression or knockdown of LRRC8A did not affect ATP-induced  $[\text{Ca}^{2+}]_{\text{c}}$  rise. *B*: Cumulative data (mean  $\pm$  SEM,  $n = 41$ -50) showing the level of LRRC8A does not influence  $[\text{Ca}^{2+}]_{\text{c}}$  rise elicited by ATP in  $\text{Ca}^{2+}$ -free conditions.

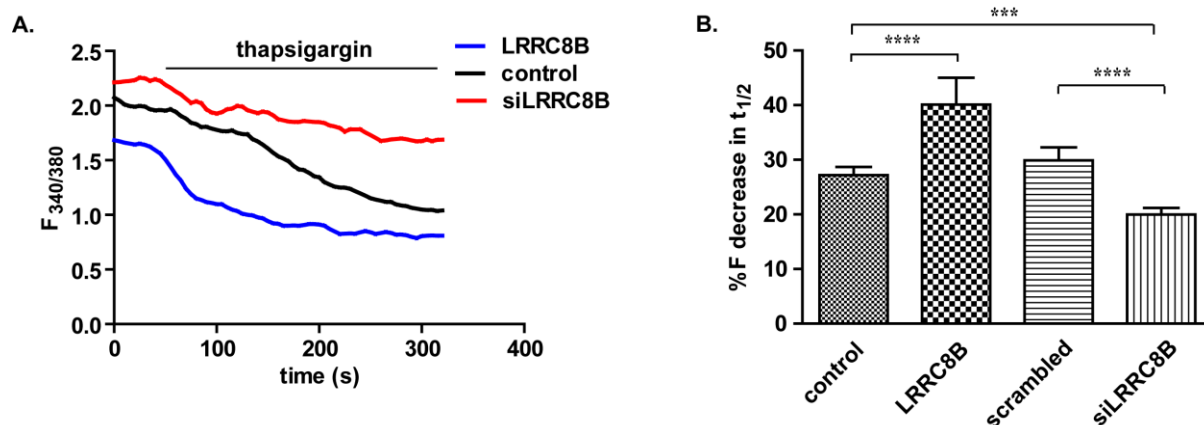

#### S 4. Modulation of $[\text{Ca}^{2+}]_{\text{ER}}$ leak rate by LRRC8B.

A: Typical traces showing the decay of luminal  $\text{Ca}^{2+}$  ( $[\text{Ca}^{2+}]_{\text{ER}}$ ), by blocking SERCA pump with  $1\mu\text{M}$  TG.  $[\text{Ca}^{2+}]_{\text{ER}}$  was measured with Mag-fura, as described in methods section. LRRC8B overexpressed and knocked down increased and decreased the decay rate respectively. B: Cumulative data for decrease in % fluorescence in  $t_{1/2}$  (mean  $\pm$  SEM,  $n = 16-27$ ) are plotted.

**Table S1. Antibody Validation**

| Protein        | Antibody catalogue no. | Company                    | References                                               | Dilution |
|----------------|------------------------|----------------------------|----------------------------------------------------------|----------|
| LRRC8A         | # HPA016811            | Sigma Aldrich              | Voss FK et. al Science, 344(6184), 634-638 (2014)        | 1:500    |
| LRRC8B         | # HPA017950            | Sigma Aldrich              | Voss FK et. al Science, 344(6184), 634-638 (2014)        | 1:500    |
| $\beta$ -actin | # A5441                | Sigma Aldrich              | Hu W et. al PNAS, 107(16), 7455-7460 (2010)              | 1:1000   |
| ERp72          | # D70D12               | Cell SignallingTechnology  | Kebede MA et al. J Clin Invest. 2014 Oct;124(10):4240-56 | 1:1000   |
| Connexin 43    | #3512                  | Cell Signalling Technology | Nimlamool W et al. Mol Biol Cell. 2015 Aug1;26(15):2755- | 1:1000   |

|      |           |                            |                                                                                 |        |
|------|-----------|----------------------------|---------------------------------------------------------------------------------|--------|
|      |           |                            | 68.                                                                             |        |
| VDAC | # D73D12  | Cell Signalling Technology | Tewari D et al. <i>Biochim Biophys Acta</i> 1848 (1 Pt A), 151-158. 2014 Oct 23 | 1:1000 |
| PARP | # 46D11   | Cell Signalling Technology | De Waal L et al. <i>Nat Chem Biol.</i> 2016 Feb;12(2):102-8.                    | 1:1000 |
| Bcl2 | # sc-7382 | Santa Cruz Biotechnology   | Pilchova I et al. <i>Cell Mol Neurobiol.</i> 2015 Jan;35(1):23-31               | 1:750  |
